# Supplementary material
Source: Copernicus journal article supplement (doi:10.5194/amt-19-2817-2026)
Supplement: Supplementary file [file amt-19-2817-2026-supplement-title-page.pdf › amt-19-2817-2026-supplement-title-page.pdf]

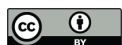

*Supplement of*

**Flow cytometry and machine learning enable identification of allergenic urban tree pollen**

**Sarah Tardif et al.**

*Correspondence to:* Sarah Tardif ([sarahtardif02@gmail.com](mailto:sarahtardif02@gmail.com))

- [amt-19-2817-2026-supplement-title-page.pdf](#)
- [Sample\\_Filtration\\_Protocol.pdf](#)
- [TableS1\\_ConfusionMatrixRF\\_species.csv](#)
- [TableS2\\_ConfusionMatrixRF\\_genus.csv](#)

The copyright of individual parts of the supplement might differ from the article licence.
